# Supplementary material for: Managing Uncertainty in Urban Road Traffic Emissions Associated with Vehicle Fleet Composition: From the Perspective of Spatiotemporal Sampling Coverage
Source: MDPI journal article supplement (doi:10.3390/su16083504), 2024-04-22
Supplement: s1 [file s1]

# **Supplementary Materials: Managing Uncertainty in Urban Road Traffic Emissions Associated with Vehicle Fleet Composition: From the Perspective of Spatiotemporal Sampling Coverage**

**Figure S1.** Location of the Yangtze River Delta and core urban area of Xuancheng;

**Table S1.** Typical spatial and temporal sampling coverage values and sampling schemes;

**Table S2.** Uncertainty quantification results corresponding to spatiotemporal sampling coverage combinations.

## Supplementary Figures

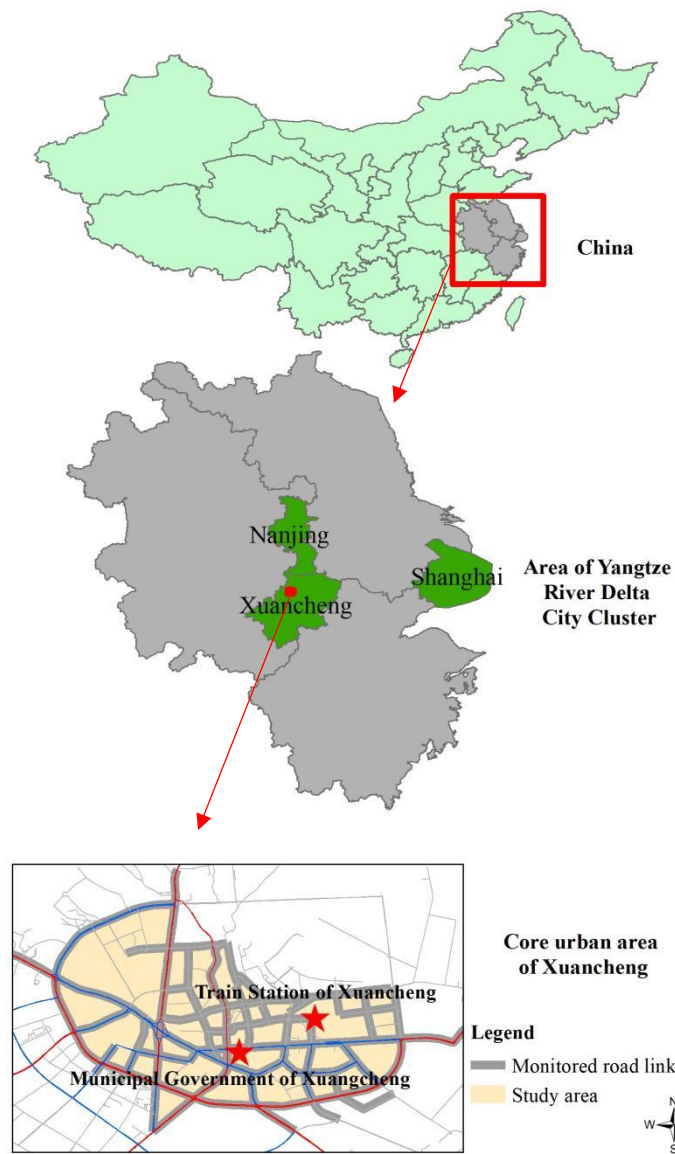

**Figure S1.** Location of the Yangtze River Delta and core urban area of Xuancheng.

Note: The data source of map of China and Yangtze River Delta is ArcGIS. The data source of the road network of Xuancheng is Open Street Map (<http://www.openstreetmap.org/>).

## Supplementary Table

**Table S1.** Typical spatial and temporal sampling coverage values and sampling schemes.

| Sampling coverage          | Sample unit  | Stratification basis               | Typical sampling coverage                                                                                      |
|----------------------------|--------------|------------------------------------|----------------------------------------------------------------------------------------------------------------|
| Spatial sampling coverage  | road segment | Road types <sup>1</sup>            | 2%, 5%, 10%, 21%, 50% and 79%<br>(correspond sample size in this study: 3, 6, 12, 24, 57 and 90 road segments) |
| Temporal sampling coverage | hour         | Daytime and Nighttime <sup>2</sup> | 8%, 16%, 25%, 50% and 80%<br>(correspond sample size in this study: 2, 4, 6, 12 and 20 hours)                  |

<sup>1</sup> Road types can be divided into three categories: expressways, arterial roads, and local roads.

<sup>2</sup> Daytime is from 07:00 to 18:59. Nighttime is from 00:00 to 06:59 and from 19:00 to 23:59.

**Table S2.** Uncertainty quantification results corresponding to spatiotemporal sampling coverage combinations.

| NO. | Spatial sampling coverage | Temporal sampling coverage | NOx uncertainties | CO <sub>2</sub> uncertainties |
|-----|---------------------------|----------------------------|-------------------|-------------------------------|
| 1   | 2%                        | 8%                         | (-48%, 100%)      | (-5%, 9%)                     |
| 2   | 2%                        | 16%                        | (-46%, 86%)       | (-5%, 8%)                     |
| 3   | 2%                        | 25%                        | (-46%, 84%)       | (-4%, 8%)                     |
| 4   | 2%                        | 50%                        | (-45%, 80%)       | (-4%, 7%)                     |
| 5   | 2%                        | 80%                        | (-44%, 78%)       | (-4%, 7%)                     |
| 6   | 10%                       | 8%                         | (-32%, 51%)       | (-3%, 5%)                     |
| 7   | 10%                       | 16%                        | (-31%, 39%)       | (-3%, 3%)                     |
| 8   | 10%                       | 25%                        | (-30%, 36%)       | (-2%, 3%)                     |
| 9   | 10%                       | 50%                        | (-29%, 35%)       | (-2%, 3%)                     |
| 10  | 11%                       | 80%                        | (-29%, 35%)       | (-2%, 3%)                     |
| 11  | 21%                       | 8%                         | (-29%, 42%)       | (-2%, 4%)                     |
| 12  | 21%                       | 16%                        | (-23%, 29%)       | (-2%, 2%)                     |
| 13  | 21%                       | 25%                        | (-21%, 26%)       | (-2%, 2%)                     |
| 14  | 21%                       | 50%                        | (-21%, 22%)       | (-2%, 2%)                     |
| 15  | 21%                       | 80%                        | (-20%, 21%)       | (-2%, 2%)                     |
| 16  | 50%                       | 8%                         | (-26%, 33%)       | (-2%, 4%)                     |
| 17  | 50%                       | 16%                        | (-16%, 21%)       | (-2%, 2%)                     |
| 18  | 50%                       | 25%                        | (-15%, 18%)       | (-2%, 1%)                     |
| 19  | 50%                       | 50%                        | (-13%, 13%)       | (-1%, 1%)                     |
| 20  | 50%                       | 80%                        | (-12%, 12%)       | (-1%, 1%)                     |
| 21  | 79%                       | 8%                         | (-25%, 31%)       | (-2%, 3%)                     |
| 22  | 79%                       | 16%                        | (-15%, 19%)       | (-1%, 2%)                     |
| 23  | 79%                       | 25%                        | (-12%, 14%)       | (-1%, 1%)                     |
| 24  | 79%                       | 50%                        | (-8%, 10%)        | (-1%, 1%)                     |
| 25  | 79%                       | 80%                        | (-5%, 6%)         | (-0.4%, 0.4%)                 |
